# Supplementary material for: Design and characterization of methoxy modified organic semiconductors based on phenyl[1]benzothieno[3,2-b][1]benzothiophene
Source: Royal Society of Chemistry journal article supplement (doi:10.1039/c6ra28074a), 2017-01-01
Supplement: c6ra28074a1.pdf [file c6ra28074a1.pdf]

## Supporting Information

# Design and characterization of methoxy modified organic semiconductors based on phenyl[1]Benzothieno[3,2-b][1]benzothiophene

Chao Yao,<sup>a</sup> Xiaolong Chen,<sup>a</sup> Yaowu He,<sup>a</sup> Yitong Guo,<sup>a</sup> Imran Murtaza,<sup>b,c</sup> Hong Meng<sup>\*,a,b</sup>

<sup>a</sup>*School of Advanced Materials, Peking University Shenzhen Graduate School, Shenzhen, 518055, China*

<sup>b</sup>*Institute of Advanced Materials, Nanjing Tech University, Nanjing 211816, China.*

<sup>c</sup>*Department of Physics, International Islamic University, Islamabad 44000, Pakistan.*

\*E-mail: [menghong@pkusz.edu.cn](mailto:menghong@pkusz.edu.cn)

## 1. $^1\text{H}$ NMR of BOP-BTBT

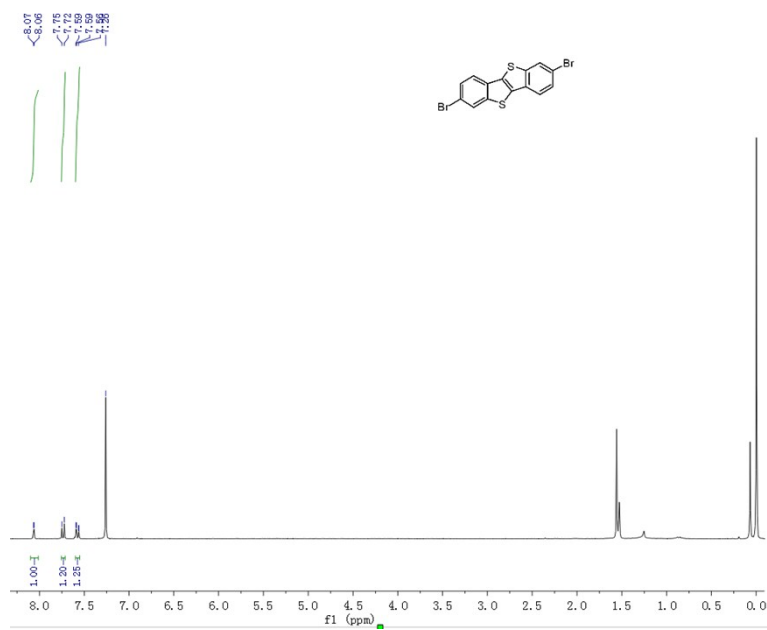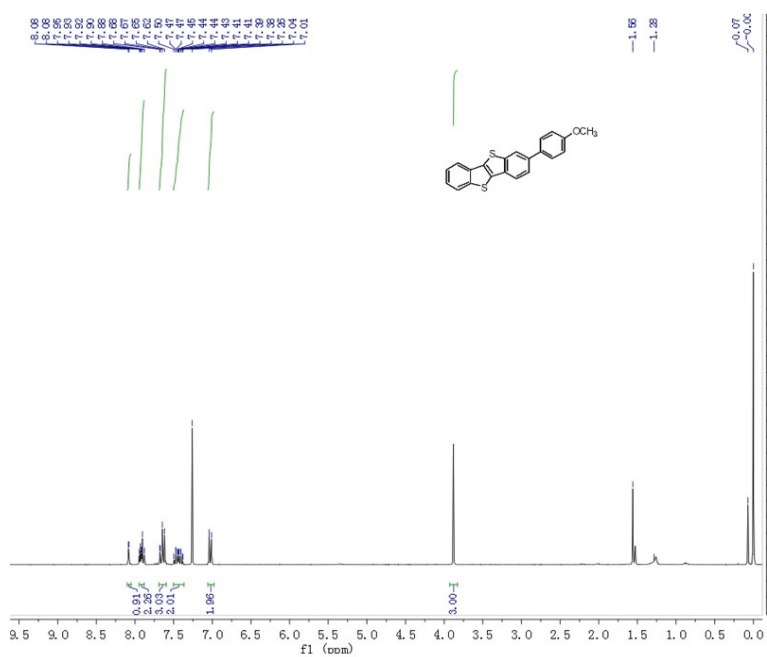

## 2. Elemental analysis for DBOP-BTBT

# 中山大学测试中心

## 分析报告

---

来样单位： 北京大学深圳研究生院                      来样日期： 2016.07.08  
样品原标识： 赵阳样品 BDBTAnt 等                      样品外观： 见下表  
分析项目： C、H、N、S 元素含量测定                      报告日期： 2016.07.14

---

检测仪器： Elementar Vario EL cube CHNS/O 元素分析仪

检测依据： JY/T 017-1996 元素分析仪方法通则

检测结果： 见下表

| 样品原标识                      | 样品外观  | 元素含量(%) |      |       |       |
|----------------------------|-------|---------|------|-------|-------|
|                            |       | C       | H    | N     | S     |
| 赵阳样品 BDBTAnt               | 黄色粉末  | 83.86   | 4.07 | < 0.2 | 11.85 |
| 李微硕样品 LWS-P1               | 深绿色粉末 | .51.46  | 6.04 | 3.48  | 15.37 |
| 姚超样品 BTBT-OCH <sub>3</sub> | 淡黄色粉末 | 74.22   | 4.47 | < 0.2 | 14.31 |
